# Supplementary material for: A component-specific exposure–mortality model for ambient PM2.5 in China: findings from nationwide epidemiology based on outputs from a chemical transport model
Source: Royal Society of Chemistry journal article supplement (doi:10.1039/d0fd00093k), 2020-07-16
Supplement: d0fd00093k1.pdf [file d0fd00093k1.pdf]

**Supplemental materials of** *A component-specific exposure-mortality model for ambient PM<sub>2.5</sub> in China: findings from a nationwide epidemiology based on outputs from a chemical transport model*

Tao Xue<sup>1</sup>, Yixuan Zheng<sup>2</sup>, Xin Li<sup>3</sup>, Jun Liu<sup>2</sup>, Qiang Zhang<sup>2</sup>, Tong Zhu<sup>4,\*</sup>

1. Institute of Reproductive and Child Health / Ministry of Health Key Laboratory of Reproductive Health and Department of Epidemiology and Biostatistics, School of Public Health, Peking University, Beijing, China;
2. Ministry of Education Key Laboratory for Earth System Modeling, Department of Earth System Science, Tsinghua University, Beijing China
3. Department of Environmental Science and Engineering, Beijing Technology and Business University, Beijing 100048, China
4. BIC-ESAT and SKL-ESPC, College of Environmental Science and Engineering, Peking University, Beijing, China, 100871

Table S1 Cross-validation results for different risk assessment models by regions.

| Region    | Model                  | Bias | RMSE | MAE  | R     |
|-----------|------------------------|------|------|------|-------|
| Central   | PM <sub>2.5</sub> -EMM | 208  | 1044 | 766  | 0.840 |
|           | BC-EMM                 | 210  | 1024 | 752  | 0.847 |
|           | SC-EMM                 | 193  | 1040 | 763  | 0.841 |
| East      | PM <sub>2.5</sub> -EMM | -849 | 2183 | 1224 | 0.848 |
|           | BC-EMM                 | -966 | 2439 | 1309 | 0.842 |
|           | SC-EMM                 | -818 | 2155 | 1214 | 0.847 |
| North     | PM <sub>2.5</sub> -EMM | -25  | 597  | 277  | 0.964 |
|           | BC-EMM                 | -19  | 504  | 257  | 0.970 |
|           | SC-EMM                 | 12   | 559  | 279  | 0.966 |
| Northeast | PM <sub>2.5</sub> -EMM | -423 | 778  | 485  | 0.941 |
|           | BC-EMM                 | -411 | 782  | 474  | 0.939 |
|           | SC-EMM                 | -403 | 741  | 463  | 0.944 |
| Northwest | PM <sub>2.5</sub> -EMM | 624  | 1609 | 970  | 0.671 |
|           | BC-EMM                 | 631  | 1599 | 965  | 0.679 |
|           | SC-EMM                 | 623  | 1605 | 967  | 0.674 |
| South     | PM <sub>2.5</sub> -EMM | 272  | 2612 | 1134 | 0.746 |
|           | BC-EMM                 | 356  | 2572 | 1128 | 0.760 |
|           | SC-EMM                 | 234  | 2585 | 1119 | 0.751 |
| Southwest | PM <sub>2.5</sub> -EMM | -183 | 1503 | 985  | 0.780 |
|           | BC-EMM                 | -135 | 1494 | 973  | 0.779 |
|           | SC-EMM                 | -97  | 1485 | 971  | 0.776 |

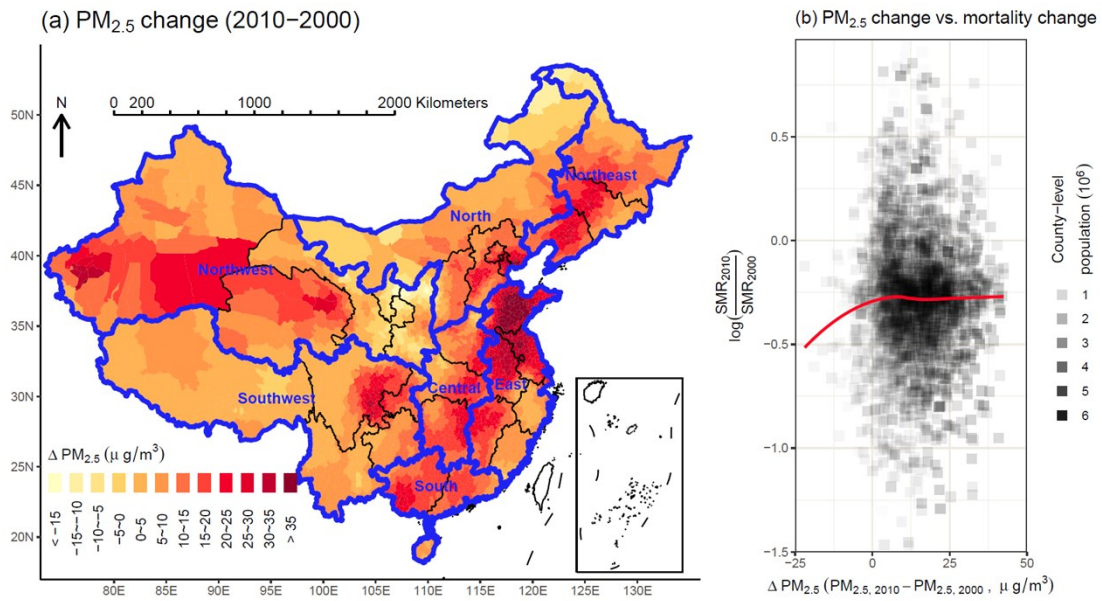

Figure S1 Variations of  $PM_{2.5}$  and mortality risks in China from 2000 to 2010. Panel (a) presents the study domain with change of  $PM_{2.5}$  concentrations in each county-level geographic unit. Panel (b) presents a scatterplot of the  $PM_{2.5}$  changes against the relative changes in standardized mortality rate, with a local regression line (red line). The map (a) also shows the seven sub-regions used in the cross-validation.

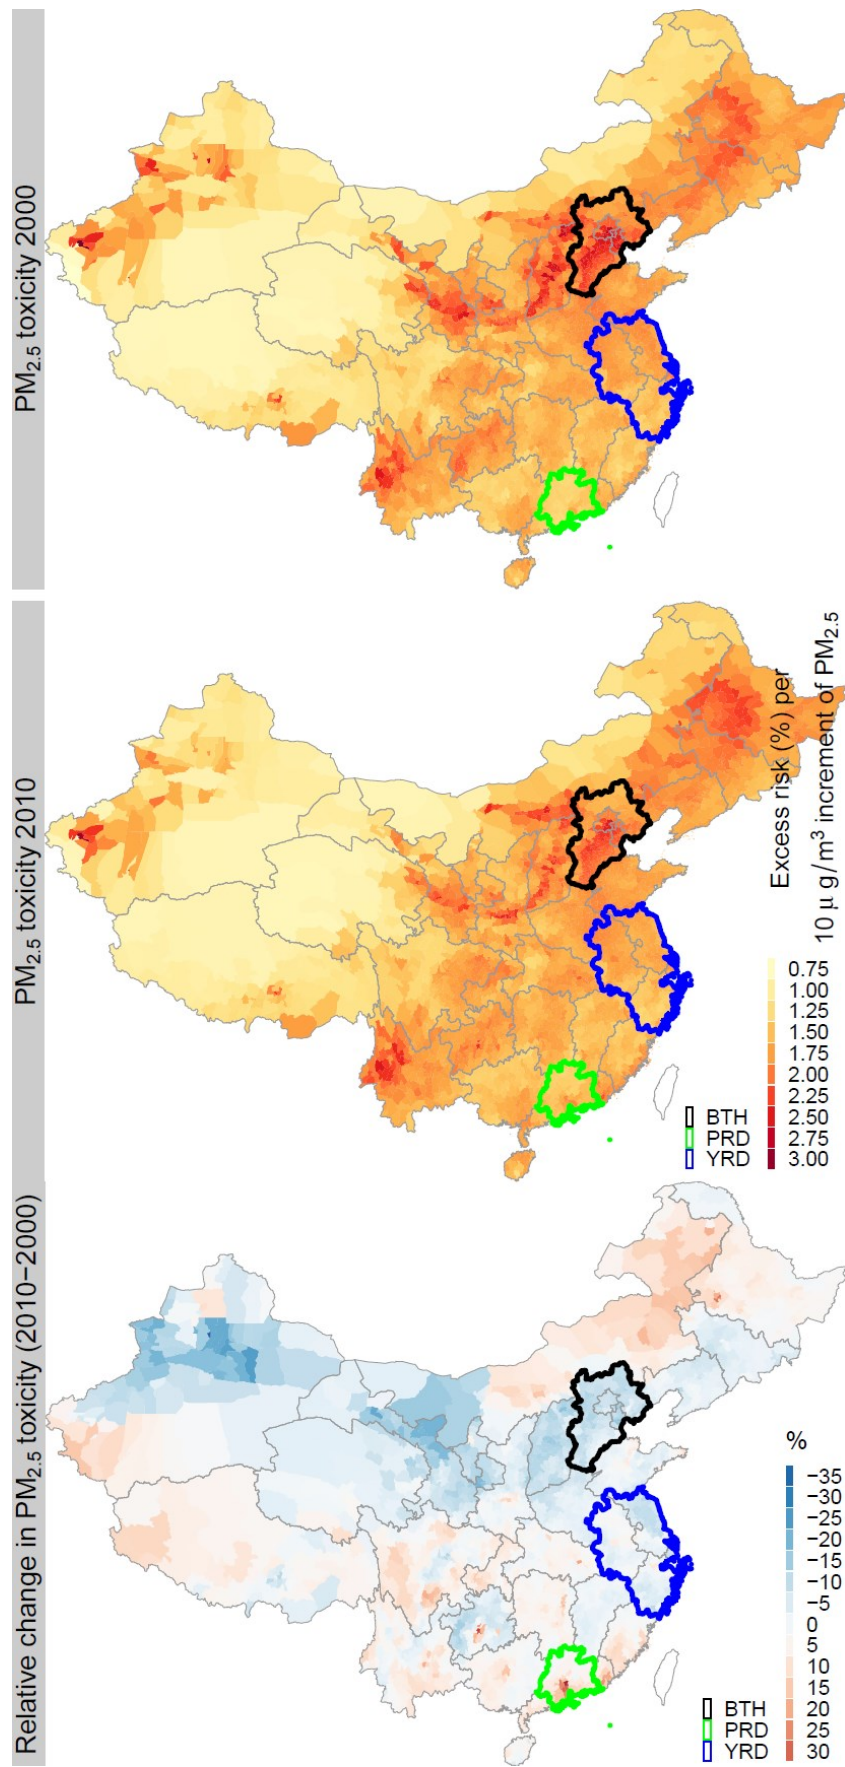

Figure S2 Spatial distribution of the PM<sub>2.5</sub> toxicity and its changes during 2000-2010.
